# Supplementary material for: Teasing Apart Translational and Transcriptional Components of Stochastic Variations in Eukaryotic Gene Expression
Source: PLoS Comput Biol. 2012 Aug 30;8(8):e1002644. doi: 10.1371/journal.pcbi.1002644 (PMC3431295; doi:10.1371/journal.pcbi.1002644)
Supplement: Table S1 — P-values for Wilxocon tests performed on the original data groups and on sampled groups. (XLSX) [file pcbi.1002644.s001.xlxs]

## Sheet: Suppl Table II
Supplementary Table S1 P-values for Wilxocon tests performed on original data groups and sampled groups of the same size: (i) size of the smaller set and (ii) both sets of 1000 genes. Each test on sampled data was repeated 1000 times and the median value is shown.
Wilcoxon test for difference	First dataset	Second dataset	Related to figure	Original tests (no sampling)			Sampling larger set to equal smaller		Sampling from both sets
				Median of log10(P-value)	Size of smaller dataset	Size of larger dataset	Median of log10(P-value)	size of the compared sets	Median of log10(P-value)	Sample size from each datasets
DM	nonribisomal genes	ribosomal genes	Figure 1b	-4.7	154	2051	-2.6	154	-13.5	1000
DM	nonribisomal genes	ribosomal genes	Figure 1c	-12.3	148	1906	-12.3	148	-73.3	1000
tAI	low noise genes	medium noise genes	Figure 2a	-3.9	571	1432	-2.8	571	-3.9	1000
tAI	medium noise genes	high noise genes		-17.3	315	571	-12	315	-29.2	1000
tAI	low noise genes	high noise genes		-35.2	315	1432	-20.7	315	-51	1000
5'UTR structure	low noise genes	medium noise genes	Figure 2b	-0.6	571	1432	-0.5	571	-0.06	1000
5'UTR structure	medium noise genes	high noise genes		-6.1	315	571	-4.3	315	-10.3	1000
5'UTR structure	low noise genes	high noise genes		-9.4	315	1432	-5.7	315	-13.3	1000
