# Supplementary material for: Teasing Apart Translational and Transcriptional Components of Stochastic Variations in Eukaryotic Gene Expression
Source: PLoS Comput Biol. 2012 Aug 30;8(8):e1002644. doi: 10.1371/journal.pcbi.1002644 (PMC3431295; doi:10.1371/journal.pcbi.1002644)
Supplement: Table S2 — Pairwise Spearman's rank correlation between DM, tAI and 5′ UTR structure for nonribosomal genes, and partial correlations controlling for tAI, 5' UTR and TATA presence. (XLSX) [file pcbi.1002644.s002.xlsx]

## Sheet: Suppl Table I
Supplementary Table S2 Pairwise Spearman's rank correlation between DM, tAI and 5'UTR structure for nonribosomal genes and partial correlations controlling for tAI, 5'UTR and TATA
Data type			YEPD medium			SD medium
X	Y	Z	Pairwise correlation cor(X,Y) or partial correlation pcor(X,Y|Z)	P-value	Number of genes	Pairwise correlation cor(X,Y) or partial correlation pcor(X,Y|Z)	P-value	Number of genes
DM	tAI	-	0.15	7.81e-12	2051	0.144	2.64e-10	1906
DM	5'UTR	-	-0.075	0.000642	2051	-0.133	6.25e-09	1906
tAI	5'UTR	-	-0.201	1.38e-22	2318	-0.201	1.38e-22	2318
DM	tAI	5'UTR	0.138	2.67e-10	2051	0.119	1.53e-07	1906
DM	5'UTR	tAI	-0.046	0.0366	2051	-0.105	3.93e-06	1906
DM	tAI	TATA	0.141	1.3e-10	2043	0.137	1.77e-09	1898
DM	5'UTR	TATA	-0.055	0.0134	2043	-0.115	5.16e-07	1898
