# Supplementary material for: Teasing Apart Translational and Transcriptional Components of Stochastic Variations in Eukaryotic Gene Expression
Source: PLoS Comput Biol. 2012 Aug 30;8(8):e1002644. doi: 10.1371/journal.pcbi.1002644 (PMC3431295; doi:10.1371/journal.pcbi.1002644)
Supplement: Table S3 — Estimates of noise strength amplification associated with the TATA box (parameter α) and the tRNA adaptation index (parameter β), based on data from YEPD and SD media. (XLSX) [file pcbi.1002644.s003.xlsx]

## Sheet: Suppl Table III
Supplementary Table S3 The estimates of noise strength amplification associated with TATA box (parameter α) and tRNA adaptation index (parameter β) based on data from YEPD and SD media.
Parameter	Source of estimation	YEPD medium	SD medium
α	Non-TATA genes with high tAI vs non-TATA genes with low tAI	1.19 ± 0.02	1.11 ± 0.03
β	TATA genes with high tAI vs non-TATA genes with high tAI	1.27 ± 0.07	1.25 ± 0.07
	TATA genes vs non-TATA genes	1.23 ± 0.07	1.30 ± 0.08
